# Supplementary material for: Genomic convergence between Akkermansia muciniphila in different mammalian hosts
Source: PubMed Central journal article supplement (PMC8555344; doi:10.1186/s12866-021-02360-6), 2021-10-29
Supplement: 12866_2021_2360_MOESM4_ESM.pdf [file 12866_2021_2360_MOESM4_ESM.pdf]

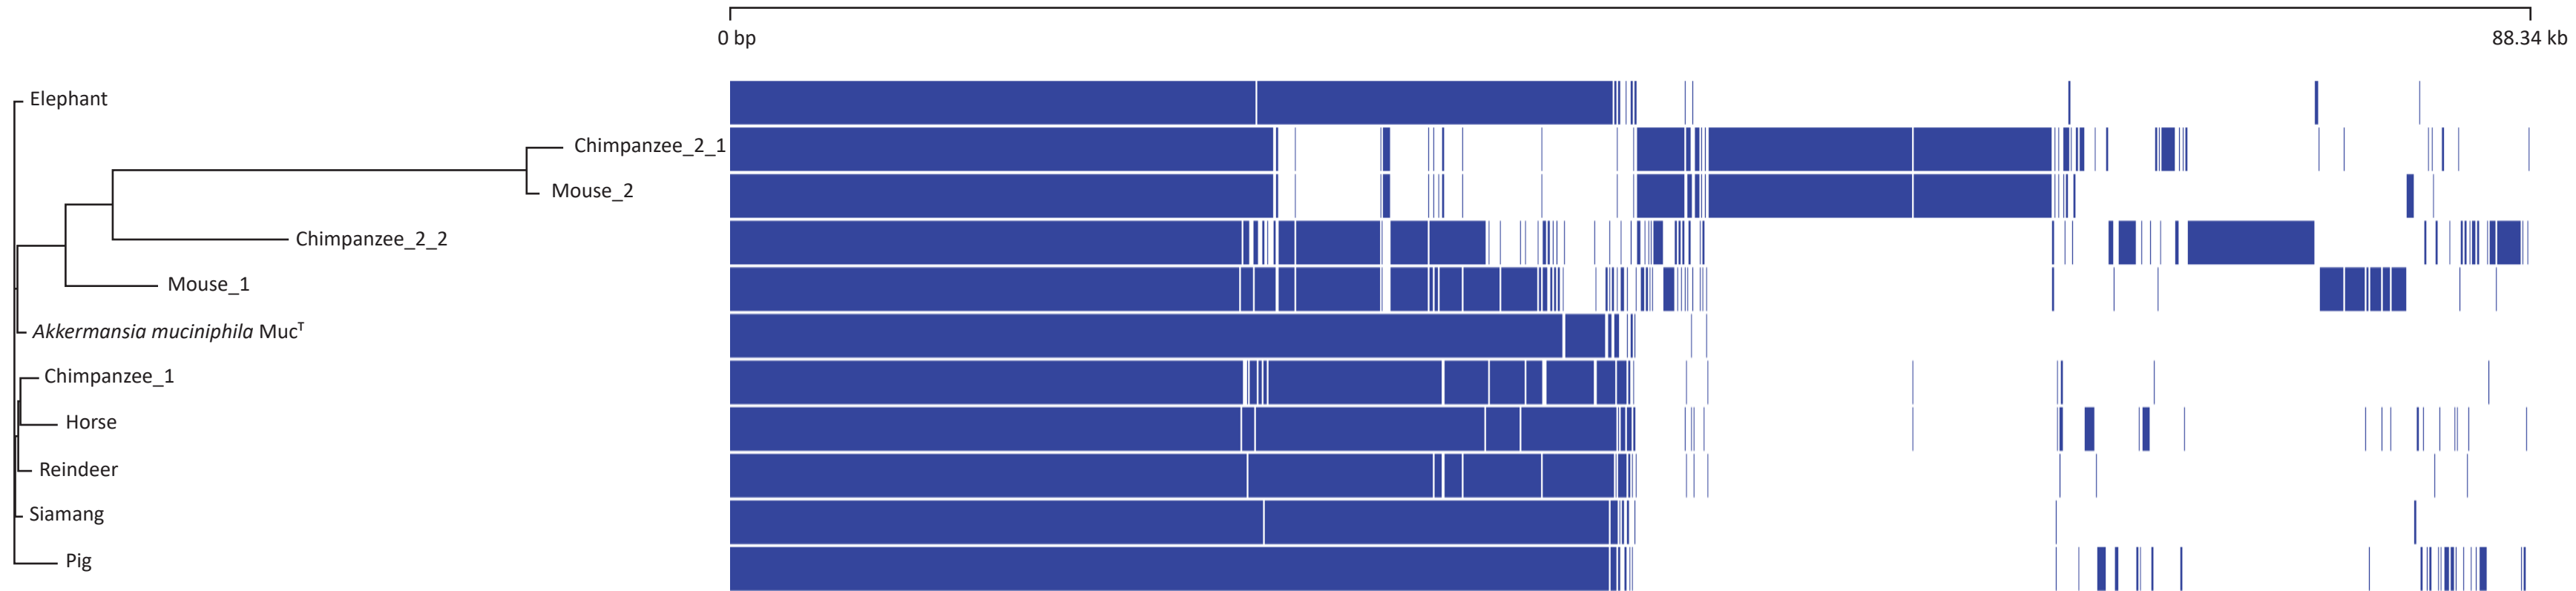

Figure S2: Pan genome of the type strain and all new *A. muciniphila* isolates visualized using Phandango
